# Supplementary material for: Baseline Albumin-Bilirubin grade as a predictor of response and outcome of regorafenib therapy in patients with hepatocellular carcinoma: a systematic review and meta-analysis
Source: Springer Nature journal article supplement (doi:10.1186/s12885-023-11488-9), 2023-10-19
Supplement: MOESM2 [file 26202054]

**A**

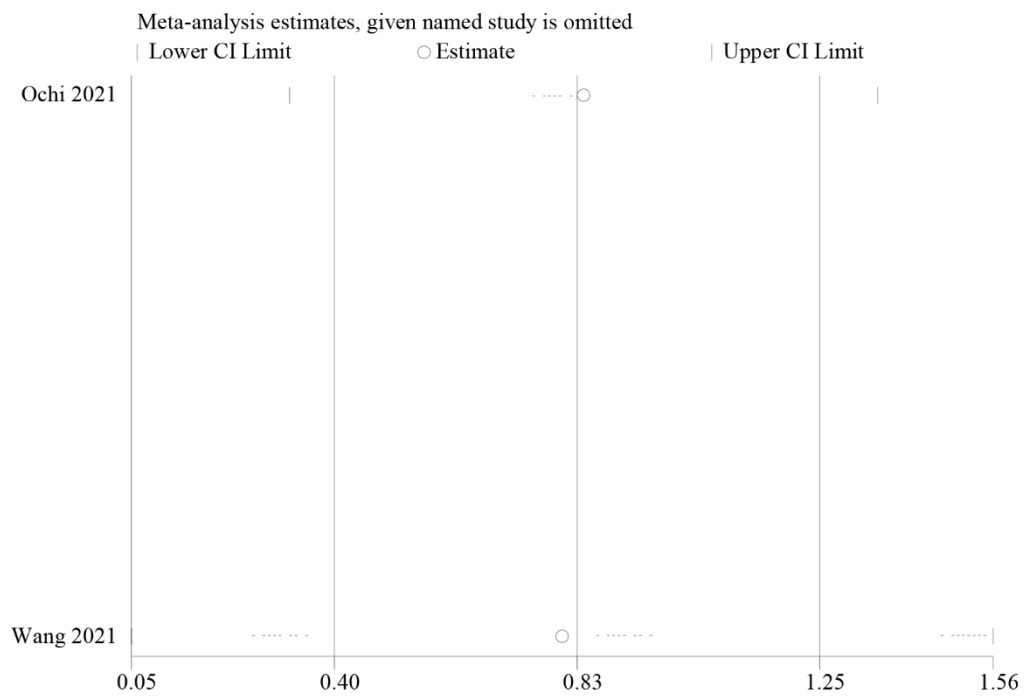

**B**

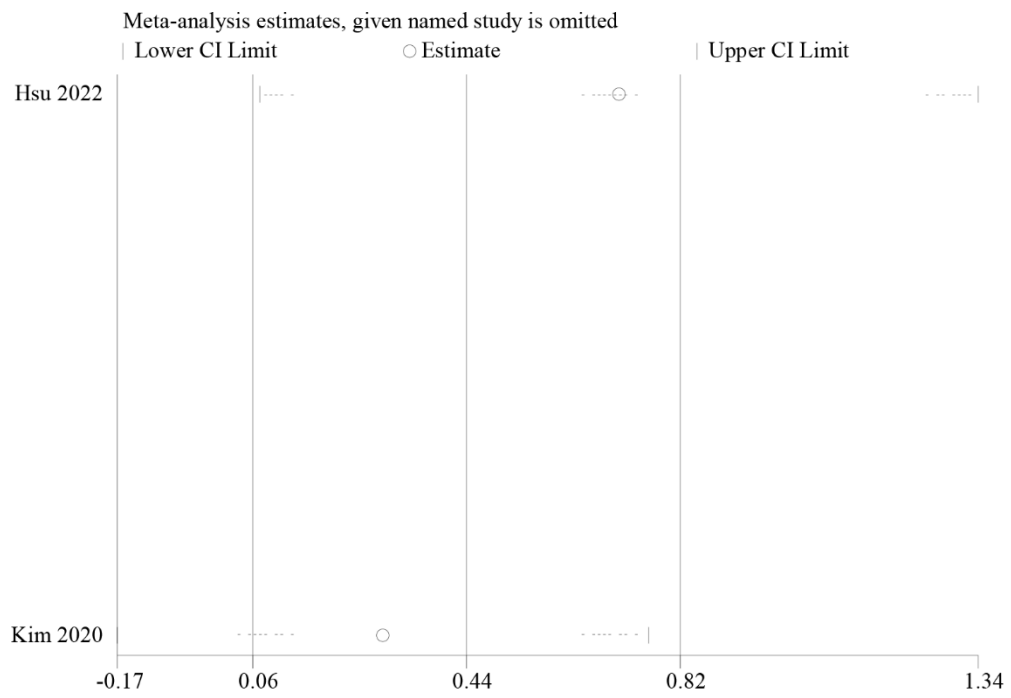

**C**

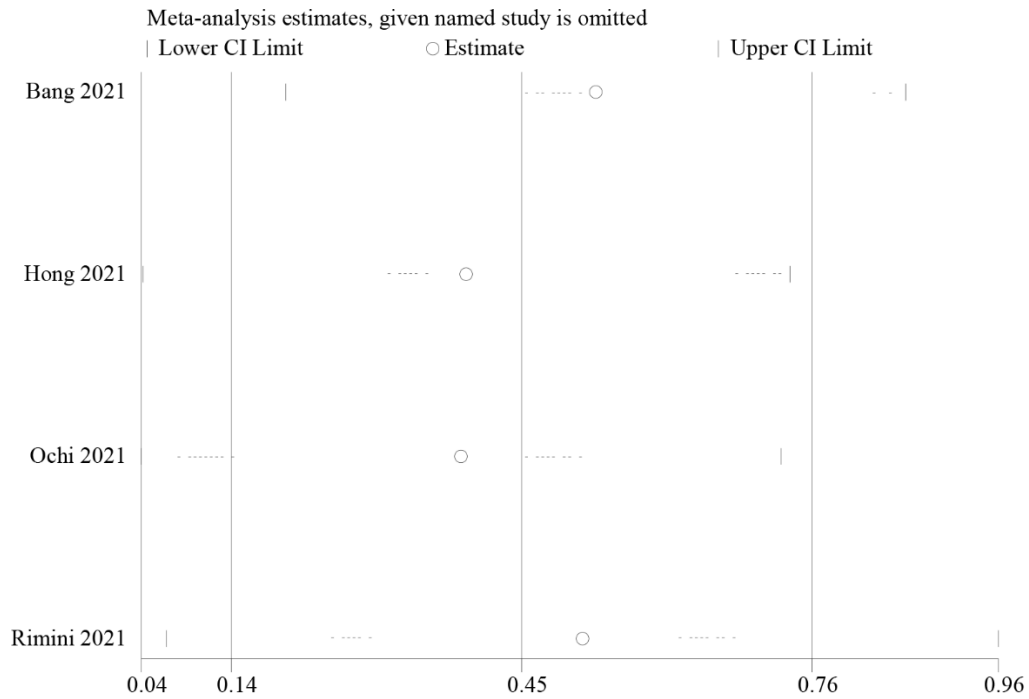

**D**

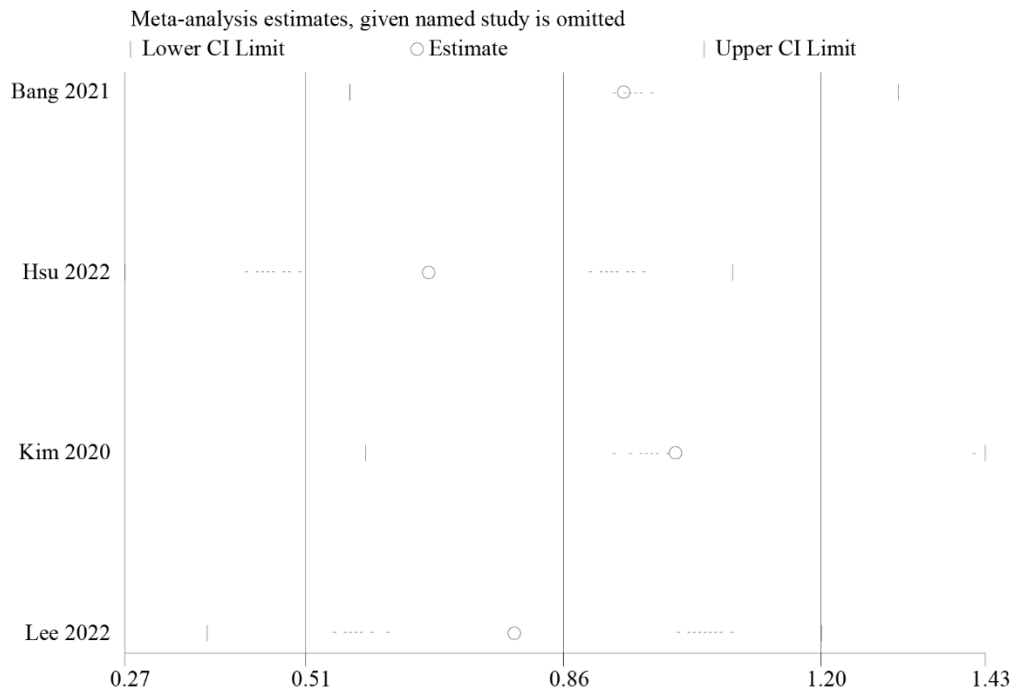

**Figure S2** Sensitivity analysis of HR OS determined by the baseline ALBI grade before sorafenib treatment (A), HR OS determined by the baseline ALBI grade before regorafenib treatment (B), HR PFS determined by the baseline ALBI grade before sorafenib treatment (C), and HR PFS determined by the baseline ALBI grade before regorafenib treatment (D). HR, hazard ratio; OS, overall survival; ALBI, albumin-bilirubin; CI, confidence interval.
